# Supplementary material for: Pathway-Based Genome-Wide Association Analysis Identified the Importance of Regulation-of-Autophagy Pathway for Ultradistal Radius BMD
Source: PubMed Central journal article supplement (PMC3153999; doi:10.1002/jbmr.36), 2010-01-29
Supplement: jbmr0025-1572-SD1.pdf [file jbmr0025-1572-SD1.pdf]

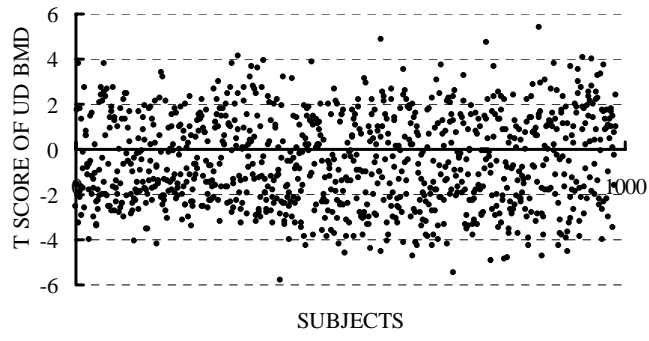

FIGURE S1.
